# Supplementary material for: CuS nanoparticles decorated MoS2 sheets as an efficient nanozyme for selective detection and photocatalytic degradation of hydroquinone in water
Source: Royal Society of Chemistry journal article supplement (doi:10.1039/d1nj00856k), 2021-01-01
Supplement: d1nj00856k1.pdf [file d1nj00856k1.pdf]

## Supporting Information

# **CuS nanoparticles decorated MoS<sub>2</sub> sheets as an efficient nanozyme for selective detection and photocatalytic degradation of hydroquinone in water**

Priyakshree Borthakur,<sup>a,b,c</sup> Purna K. Boruah,<sup>a,b</sup> Punamshree Das,<sup>a, b</sup> Manash R. Das<sup>a,b</sup>

*<sup>a</sup>Materials Sciences and Technology Division, CSIR-North East Institute of Science and  
Technology, Jorhat 785006, Assam, India*

*<sup>b</sup>Academy of Scientific and Innovative Research, Ghaziabad 201002, India*

*<sup>c</sup>Department of Chemistry, Pragjyotish College, Guwahati 781009, Assam, India*

## 1 Characterization of CuS-MoS<sub>2</sub> nanocomposite

The crystallographic structure of the nanocomposite was investigated by X-ray diffraction (XRD) using a Rigaku X-ray diffractometer (model: ULTIMA IV, Rigaku, Japan) with a scanning rate of  $3^\circ \text{ min}^{-1}$  at  $2\theta$  values  $5\text{--}100^\circ$  with a Cu K $\alpha$  X-ray radiation ( $\lambda = 1.54056 \text{ \AA}$ ) at a generator voltage of 40 kV and a current of 40 mA. The specific surface area of the synthesized CuS-MoS<sub>2</sub> nanocomposite was examined by nitrogen gas adsorption study at 77 K by using an Autosorb-iQ Station 1 (Quantachrome, USA) and applying Brunauer–Emmett–Teller (BET) calculations. Before performing the experiments, the samples were degassed at  $200^\circ \text{C}$  for 3h. The morphology and the particle size of the synthesized nanocomposite were determined by high resolution transmission electron microscopy (HRTEM) using JEOL JEM 2100 PLUS, transmission electron microscope, Japan, operated at an accelerating voltage of 200 kV.

The chemical composition of the synthesized nanocomposite CuS-MoS<sub>2</sub> was examined by X-ray photoelectron spectroscopy (XPS) measurements using a Thermo- Scientific ESCALAB Xi+ spectrometer with a monochromatic Al K $\alpha$  X-ray source (1486.6 eV) and a spherical energy analyser that operates in the CAE (constant analyser energy) mode using the electromagnetic lens mode. The CAE is 100 eV for survey spectra and that for high-resolution spectra is 50 eV. The zeta potential of CuS-MoS<sub>2</sub> catalyst suspensions at different pH and in presence of different inorganic salts was calculated by measuring the electrophoretic mobility using a Zetasizer analyzer (Model: Nano ZS, Malvern, UK) instrument and the Smoluchowski equation.

The colorimetric detection and photocatalytic degradation of HQ molecule were monitored using a UV–vis spectrophotometer (MS-11-UV-1800, Shimadzu, Japan).

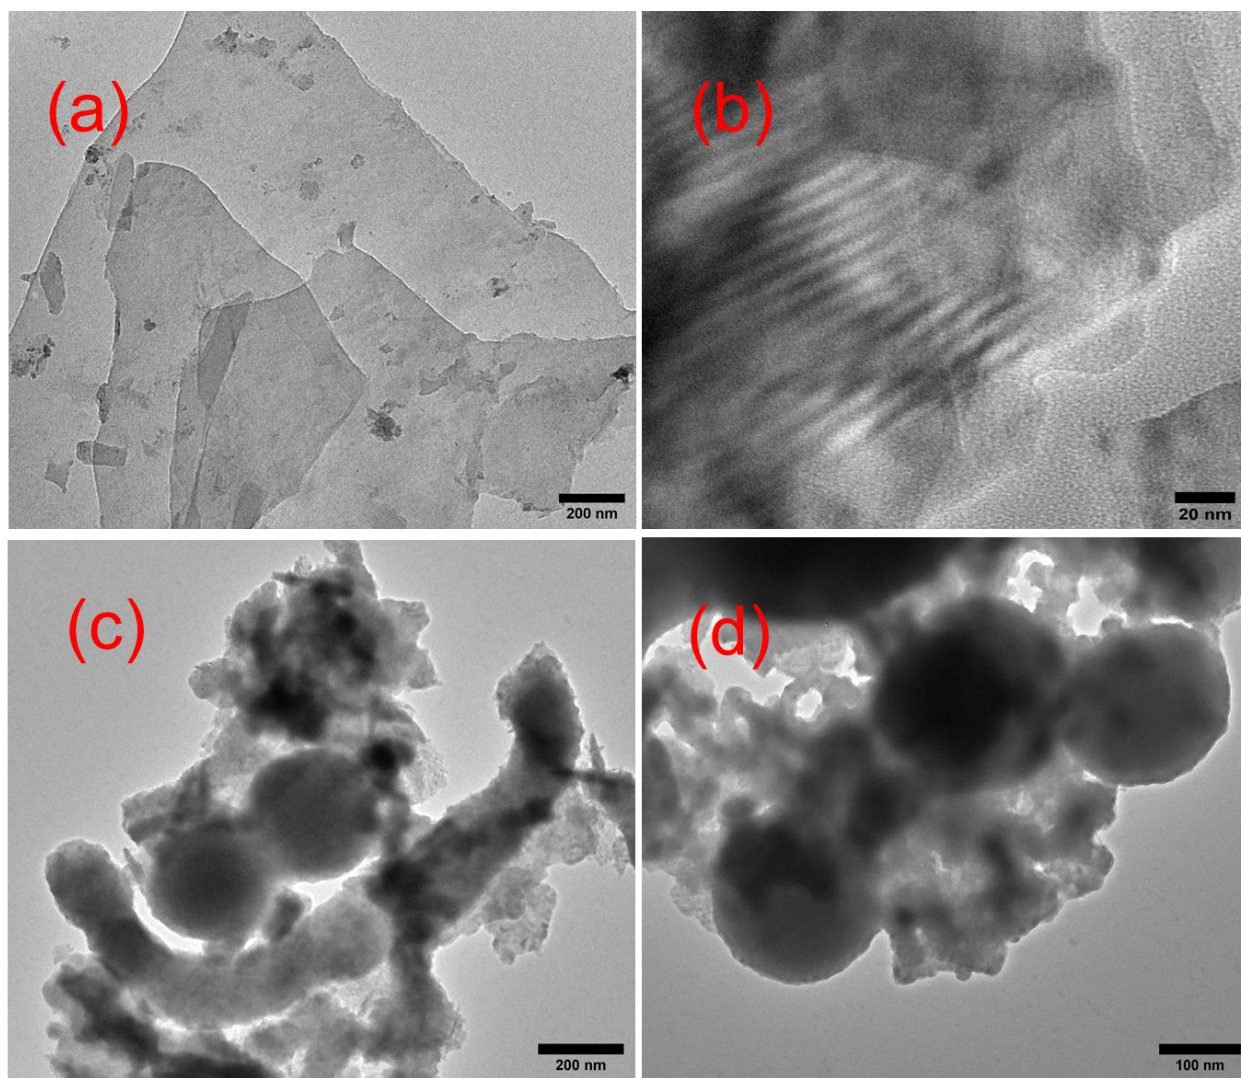

**Fig. S1** (a) TEM and (b) HRTEM image of MoS<sub>2</sub> sheets and (c) TEM images of CuS nanoparticles

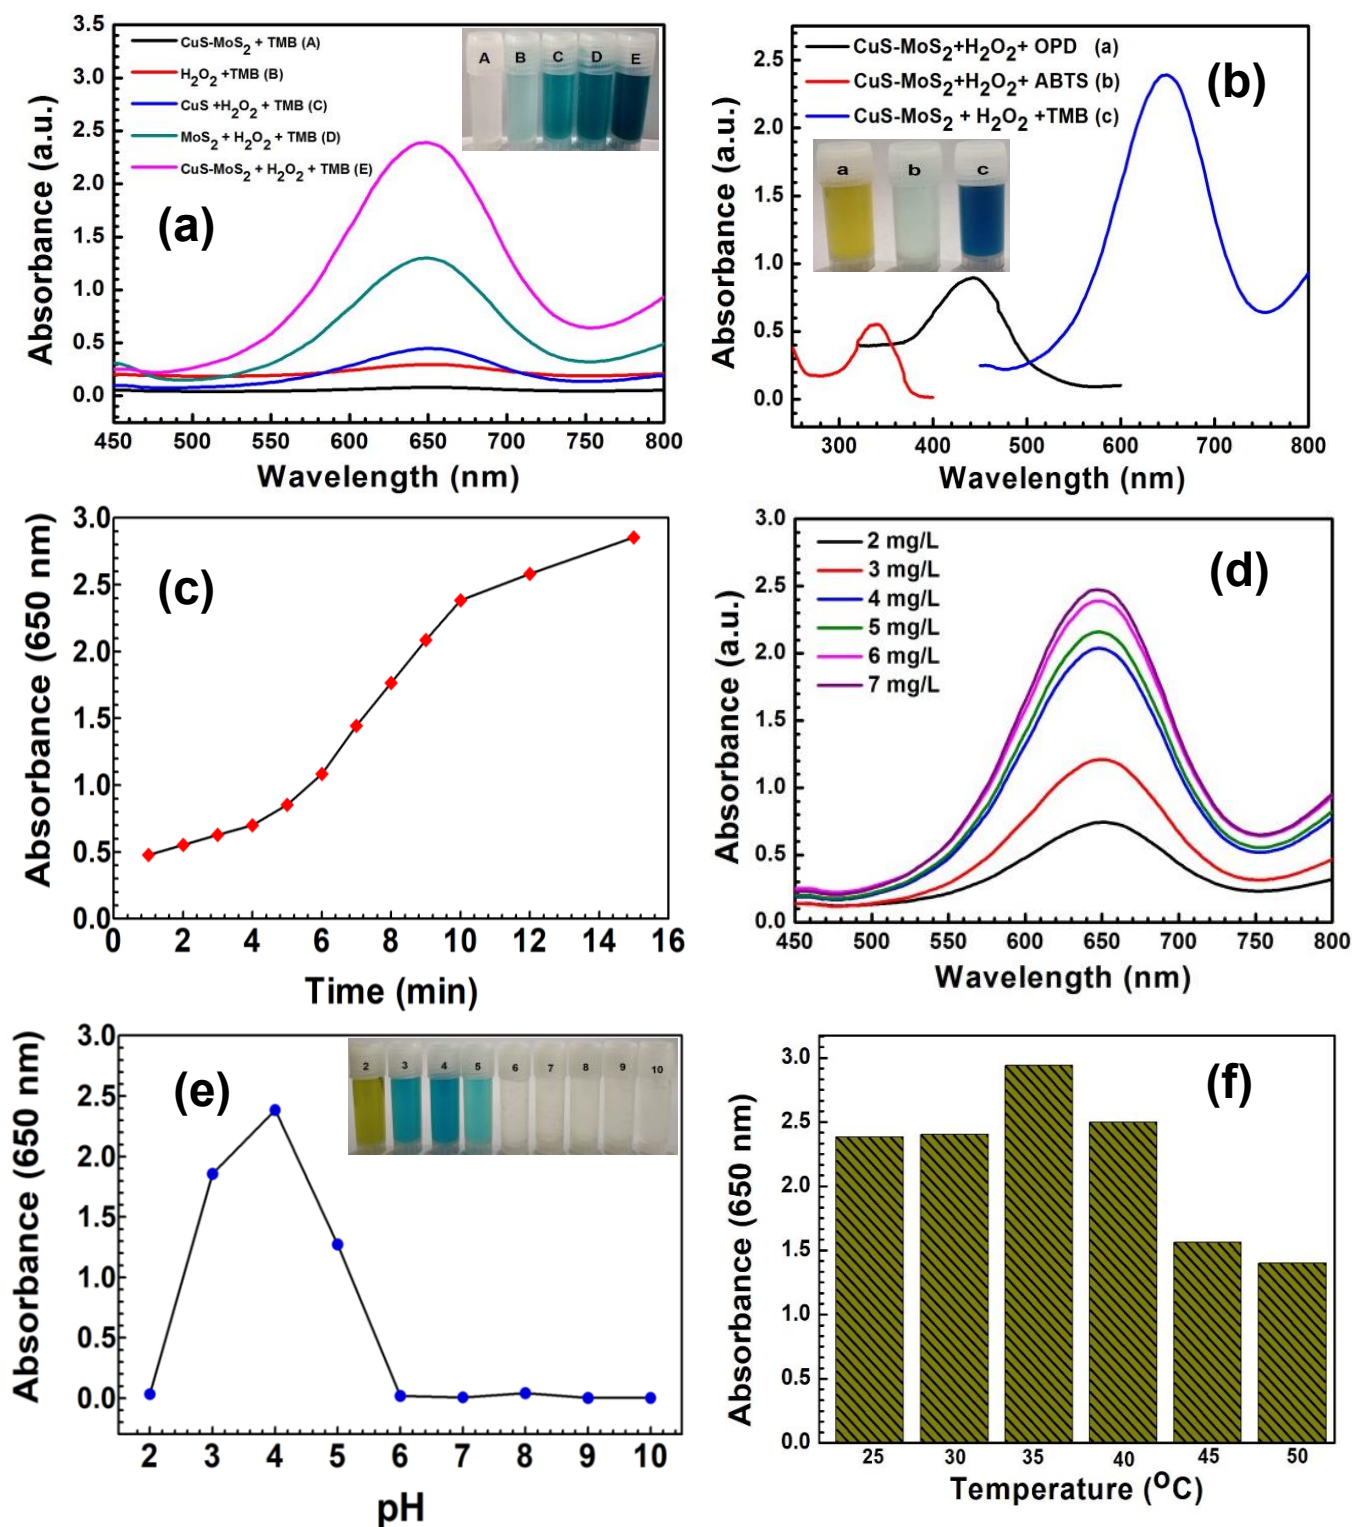

**Fig. S2** (a) UV-vis spectral analysis of oxTMB solution under different experimental conditions; (Catalyst dosage = 6 mg/L, pH = 4, temperature = 25 °C, TMB = 0.5 mM, Incubation time = 10 min) (b) Peroxidase like catalytic activity of CuS-MoS<sub>2</sub> nanocomposite towards different

peroxidase substrate; effect of (c) incubation time, (d) catalyst concentration (e) pH and (f) temperature on the oxidation reaction of TMB to oxTMB in presence of CuS-MoS<sub>2</sub> nanocomposite.

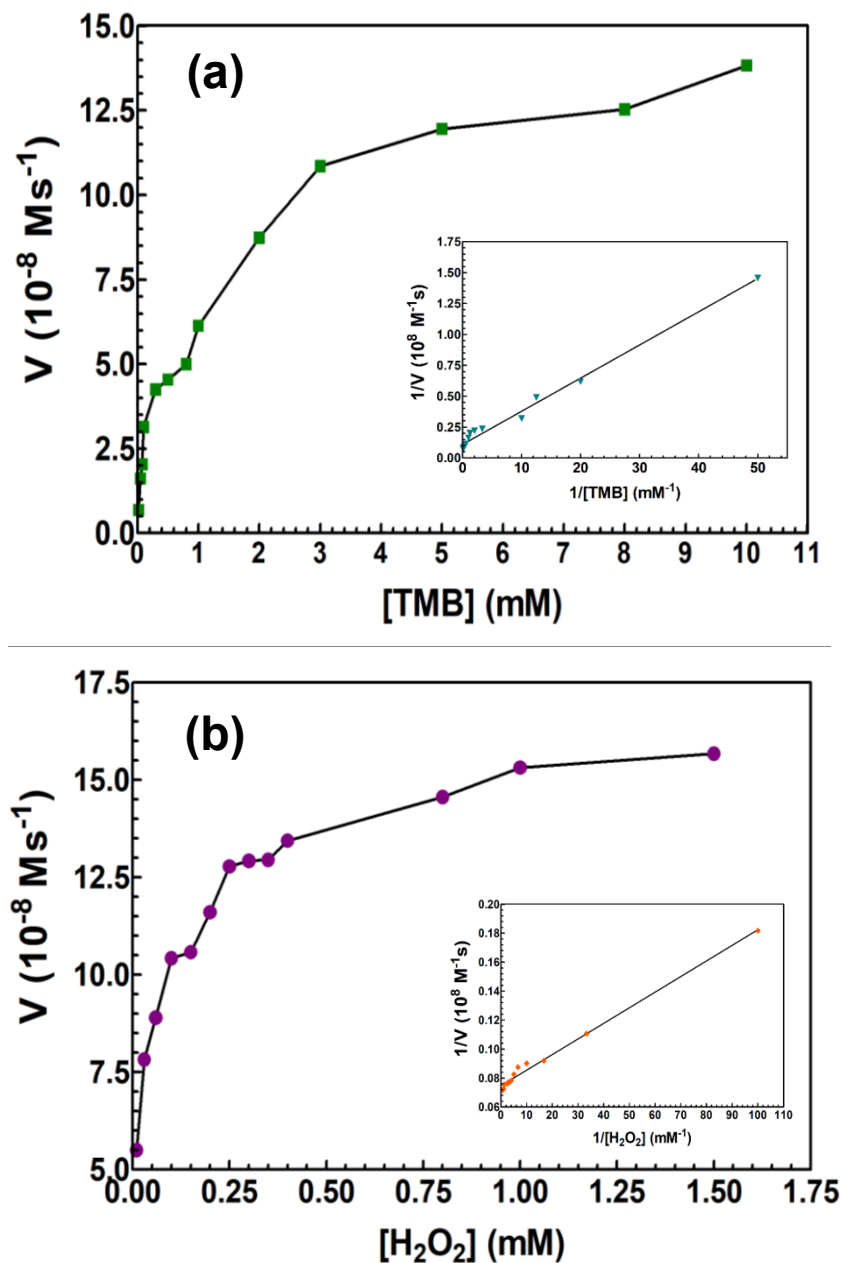

**Fig. S3** Steady-state kinetic assay with (a) Variation of TMB concentration (0.02–10.0 mM) at constant H<sub>2</sub>O<sub>2</sub> concentration (5 mM) and (b) for variation of H<sub>2</sub>O<sub>2</sub> concentration (0.01–1.5 mM)

at constant TMB concentration (0.5 mM) for CuS-MoS<sub>2</sub>. The corresponding Lineweaver–Burk plots of the double reciprocal of Michaelis-Menten equation are shown in the insets.

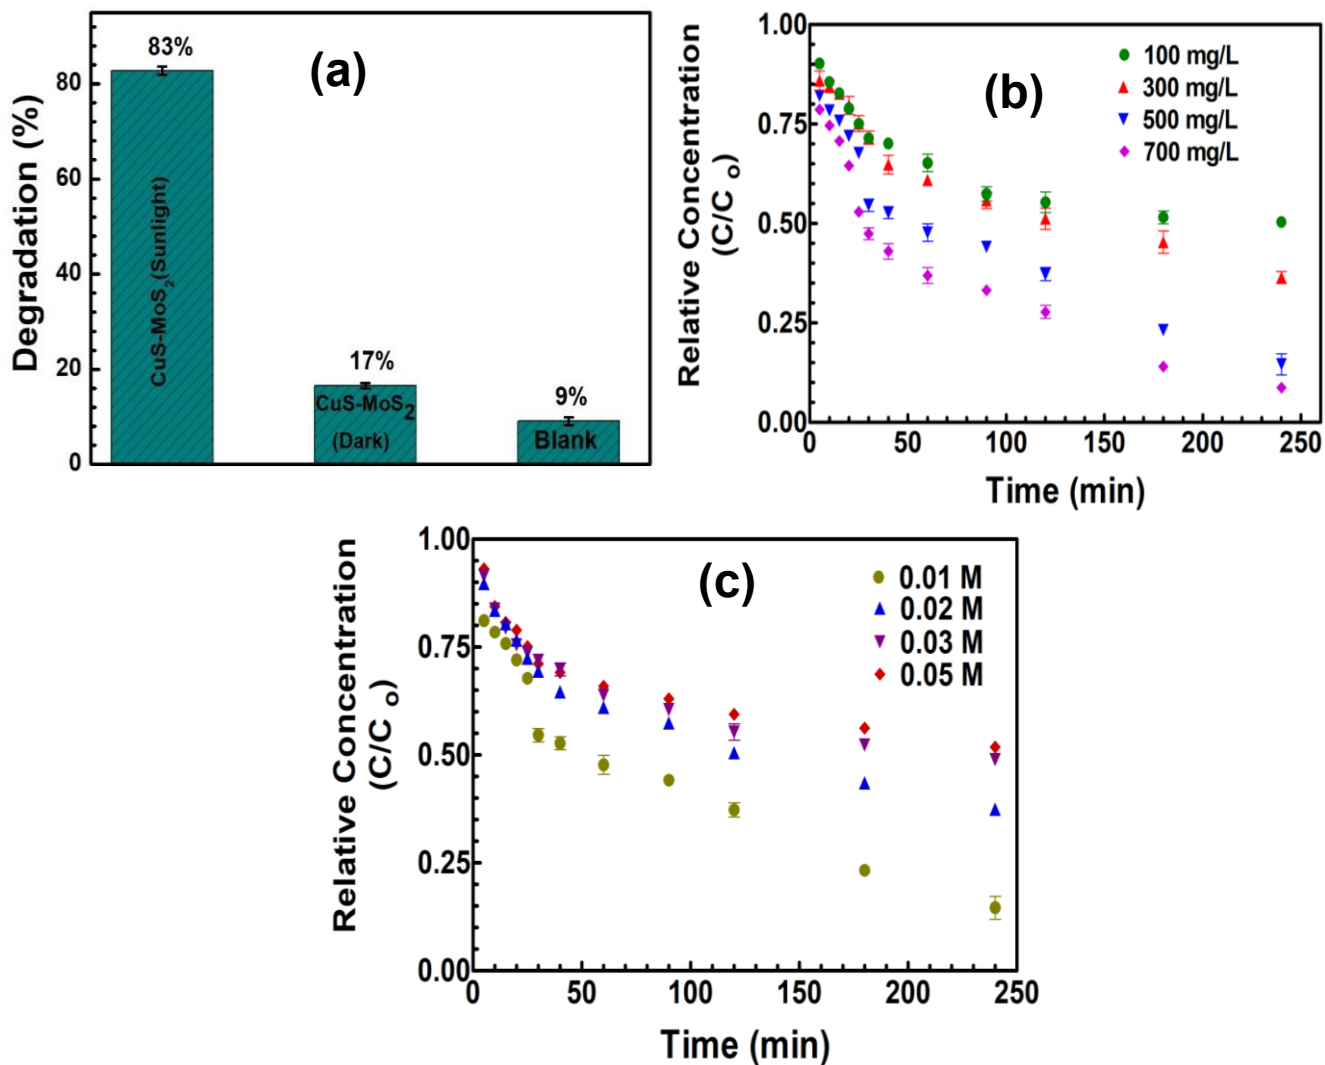

**Fig. S4** (a) Comparative degradation of HQ under different experimental conditions (HQ concentration: 0.01M; Time: 240 min; pH: 5), (b) Effect of catalyst dosages on the degradation process (HQ concentration: 0.01M; pH: 5), (c) Effect of HQ concentration on the degradation process (Catalyst dosage: 500 mg/L; pH 5)

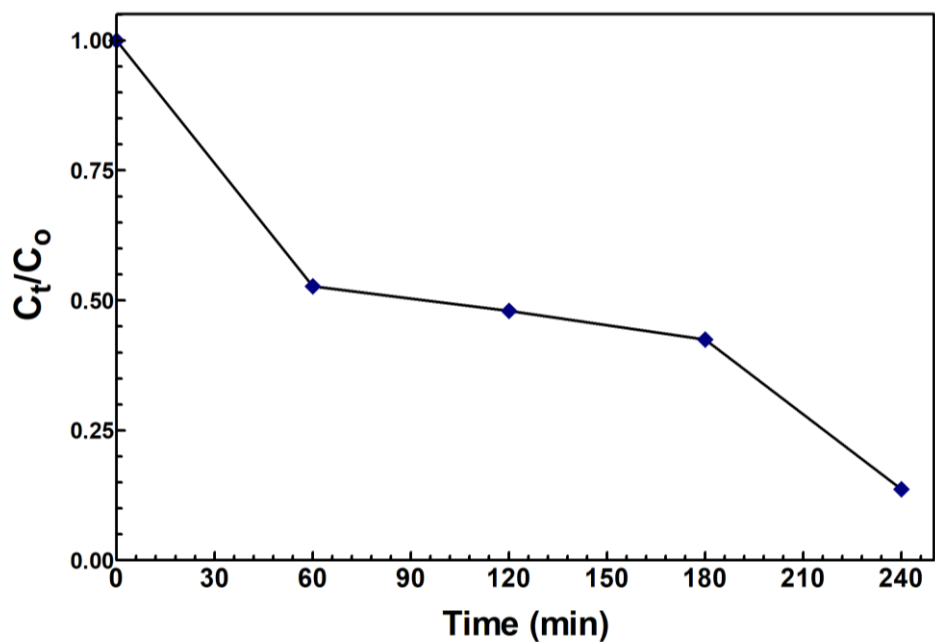

**Fig. S5** COD removal for photocatalytic degradation of HQ in presence of CuS-MoS<sub>2</sub> (Catalyst dosage: 500 mg/L; HQ Conc. 0.01 M, pH 5)

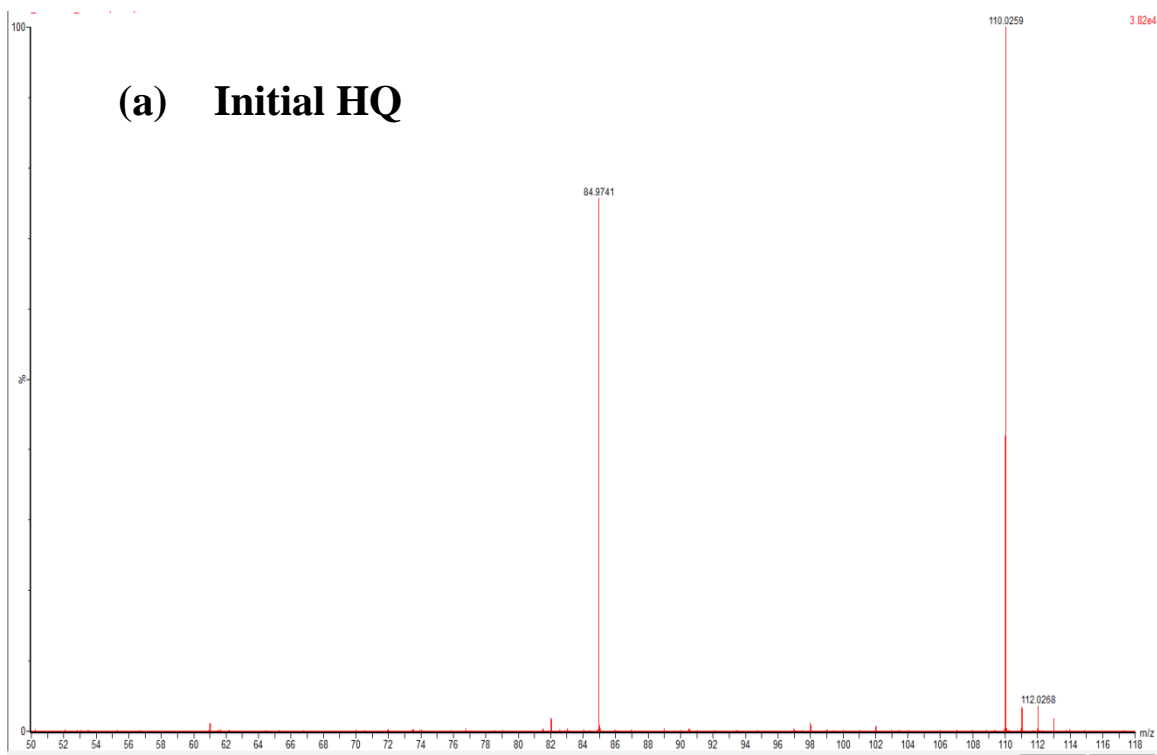

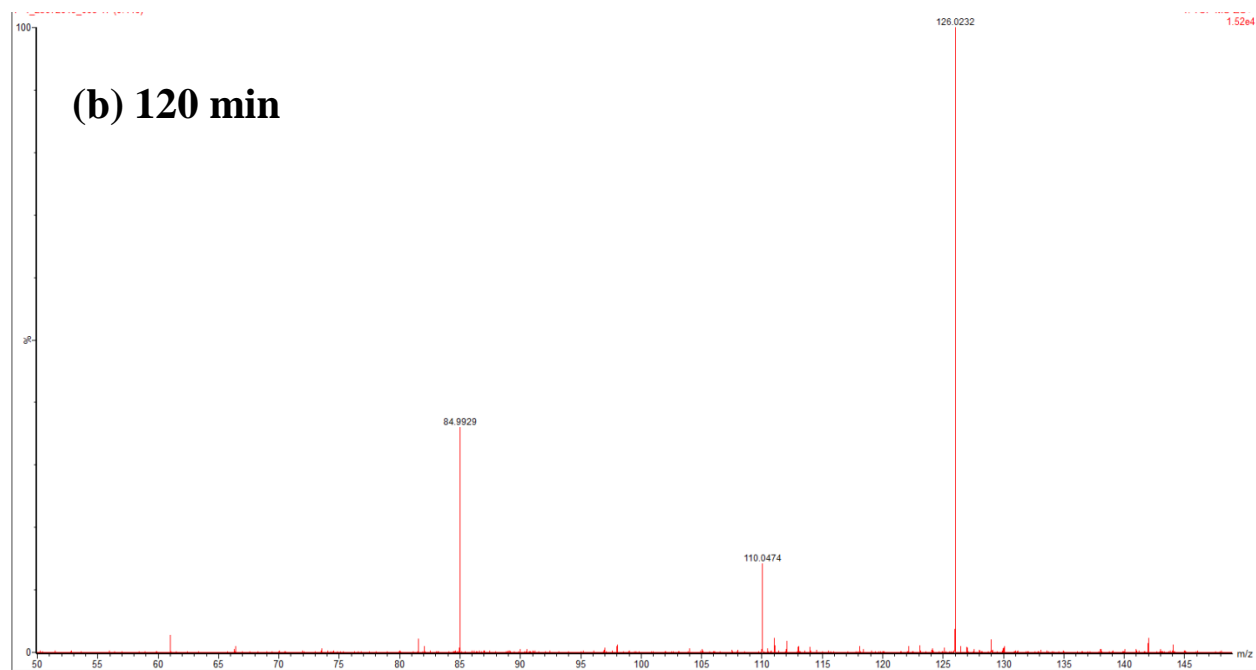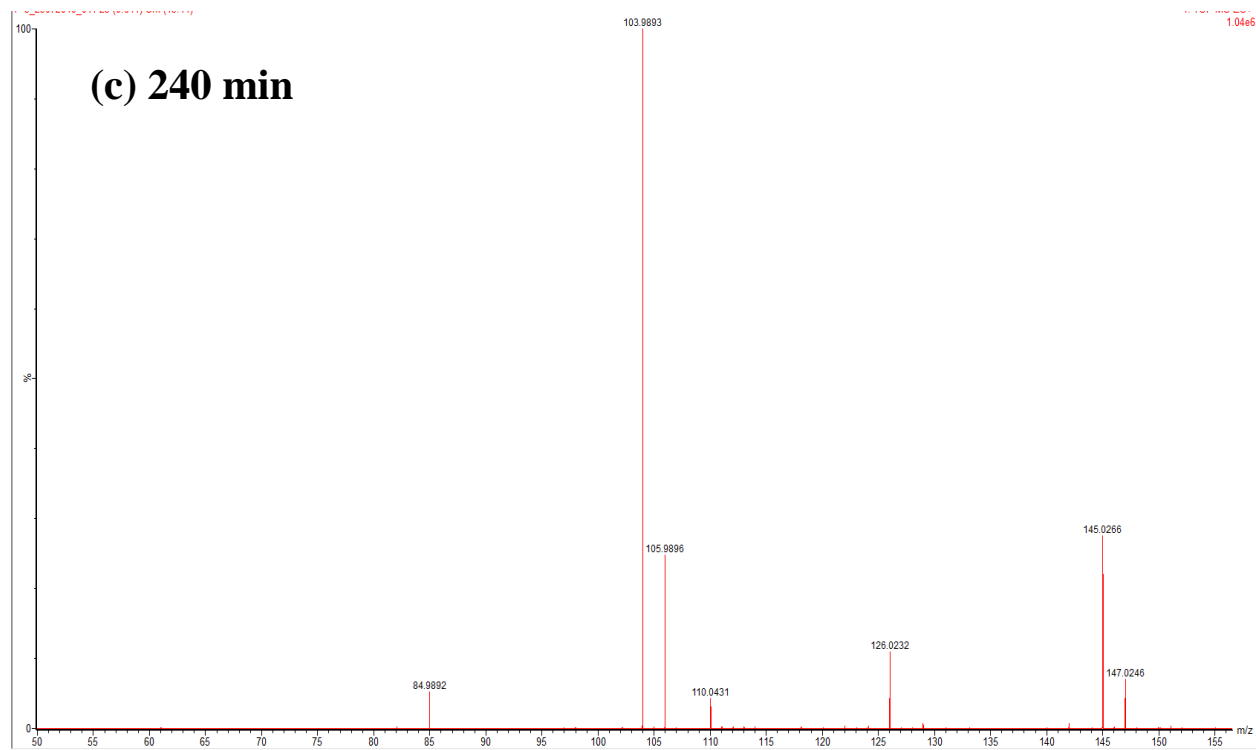

**Fig. S6** HR-MS spectra of (a) initial HQ solution and (b) degradation products after 120 min and (c) 240 min.



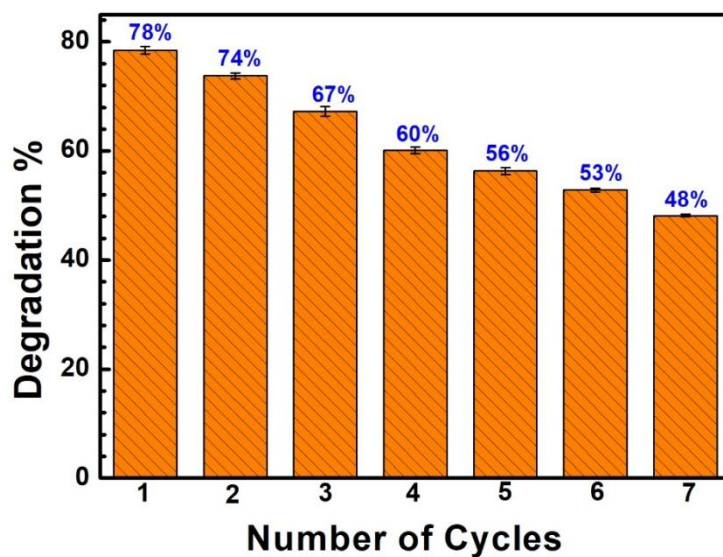

**Fig. S7** Reusability study of CuS-MoS<sub>2</sub> photocatalyst towards HQ degradation (Catalyst Conc.: 500 mg/L; HQ Conc.: 0.01 M; pH 5, Time: 240 min)

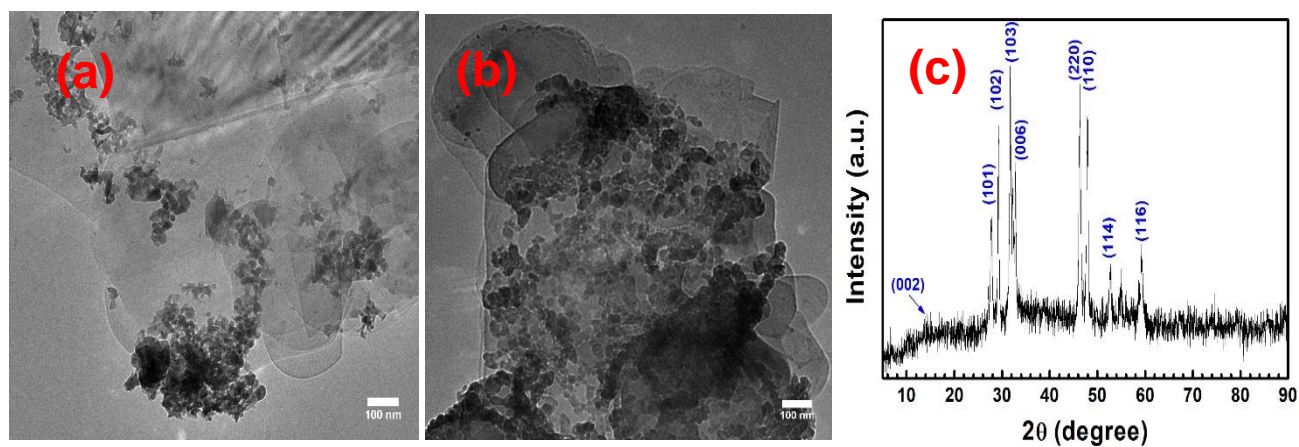

**Fig. S8** TEM images (a,b), XRD pattern of CuS-MoS<sub>2</sub> after use in 5<sup>th</sup> repeated cycle as photocatalyst

**Table S1** Specific Surface Area, Pore Volume, and Pore Radius of different species

| <b>Catalysts</b>                   | <b>Specific surface area<br/>(m<sup>2</sup>/g)</b> | <b>Pore volume<br/>(cm<sup>3</sup>/g)</b> | <b>Pore radius (Å)</b> |
|------------------------------------|----------------------------------------------------|-------------------------------------------|------------------------|
| MoS <sub>2</sub> sheets            | 10.582                                             | 0.046                                     | 17.686                 |
| CuS nanoparticles                  | 3.435                                              | 0.008                                     | 17.682                 |
| CuS-MoS <sub>2</sub> nanocomposite | 18.264                                             | 0.076                                     | 43.261                 |

**Table S2** Comparative colorimetric detection of HQ in presence of different nanozymes

| <b>Catalyst</b>                                     | <b>Detection method</b> | <b>LOD</b> | <b>Ref</b>    |
|-----------------------------------------------------|-------------------------|------------|---------------|
| ZnO/ZnFe <sub>2</sub> O <sub>4</sub> /graphene foam | Colorimetric            | 3.75 μM    | 1             |
| NiCo <sub>2</sub> O <sub>4</sub> microspheres       | Colorimetric            | 2.7 μM     | 2             |
| Au nanoparticles                                    | Colorimetric            | 0.53 μM    | 3             |
| CuS-MoS <sub>2</sub>                                | Colorimetric            | 3.68 μM    | Present study |

**Table S3** Degradation efficiency of different photocatalysts towards HQ degradation

| Photocatalyst                                                 | Light source  | Power | Light intensity      | Photodegradation efficiency (%) | Time    | Rate of degradation       | Ref.          |
|---------------------------------------------------------------|---------------|-------|----------------------|---------------------------------|---------|---------------------------|---------------|
| PVFF-TiO <sub>2</sub> -Fe oxide/H <sub>2</sub> O <sub>2</sub> | Solar light   | ---   |                      | 97                              | 120 min | ----                      | 4             |
| Au/TiO <sub>2</sub> /RGO nanostructures                       | visible light | 500 W |                      | 77                              | 1 h     | 0.0174 min <sup>-1</sup>  | 5             |
|                                                               | UV light      | 30 W  |                      | 90                              |         | 0.0518 min <sup>-1</sup>  |               |
| NanoTiO <sub>2</sub> /ACS PCR                                 | UV light      | 25 W  |                      | 80                              | 3 h     | 0.01003 min <sup>-1</sup> | 6             |
| CuS-MoS <sub>2</sub>                                          | Sunlight      | ----- | 780 W/m <sup>2</sup> | 83                              | 4 h     | 0.0078 min <sup>-1</sup>  | Present study |

## References

- 1 X. Wang, M. Zhao, Y. Song, Q. Liu, Y. Zhang, Y. Zhuang and S. Chen, *Sens. Actuator. B*, 2019, **283**, 130-137.
- 2 Y. Song, M. Zhao, H. Li, X. Wang, Y. Cheng, L. Ding, S. Fan and S. Chen, *Sens. Actuat. B*, 2018, **255**, 1927-1936.
- 3 M. R. Nezhad, M. Alimohammadi, J. Tashkhourian and S. M. Razavian, *Spectrochim. Acta Part A*, 2008, **71**, 199-203.
- 4 F. Mazille, T. Schoettl and C. Pulgarin, *Appl. Catal. B*, 2009, **89**, 635-644.
- 5 L. Zhao, H. Xu, B. Jiang and Y. Huang, *Part. Part. Syst. Charact.*, 2017, **34**, 1600323.
- 6 Q. Geng, Q. Guo, C. Cao and L. Wang, *Ind. Eng. Chem. Res.*, 2008, **47**, 2561-2568.
